# Supplementary material for: Altered BAF occupancy and transcription factor dynamics in PBAF-deficient melanoma
Source: PubMed Central journal article supplement — Cell Rep. Author manuscript; Available in PMC 2022 Apr 16. (PMC9013128; doi:10.1016/j.celrep.2022.110637), 2022-04-05
Supplement: NIHMS1795992-supplement-1.pdf [file NIHMS1795992-supplement-1.pdf]

**Supplemental information**

**Altered BAF occupancy and  
transcription factor dynamics  
in PBAF-deficient melanoma**

**Saul Carcamo, Christie B. Nguyen, Elena Grossi, Dan Filipescu, Aktan Alpsoy, Alisha Dhiman, Dan Sun, Sonali Narang, Jochen Imig, Tiphaine C. Martin, Ramon Parsons, Iannis Aifantis, Aristotelis Tsirigos, Julio A. Aguirre-Ghiso, Emily C. Dykhuizen, Dan Hasson, and Emily Bernstein**

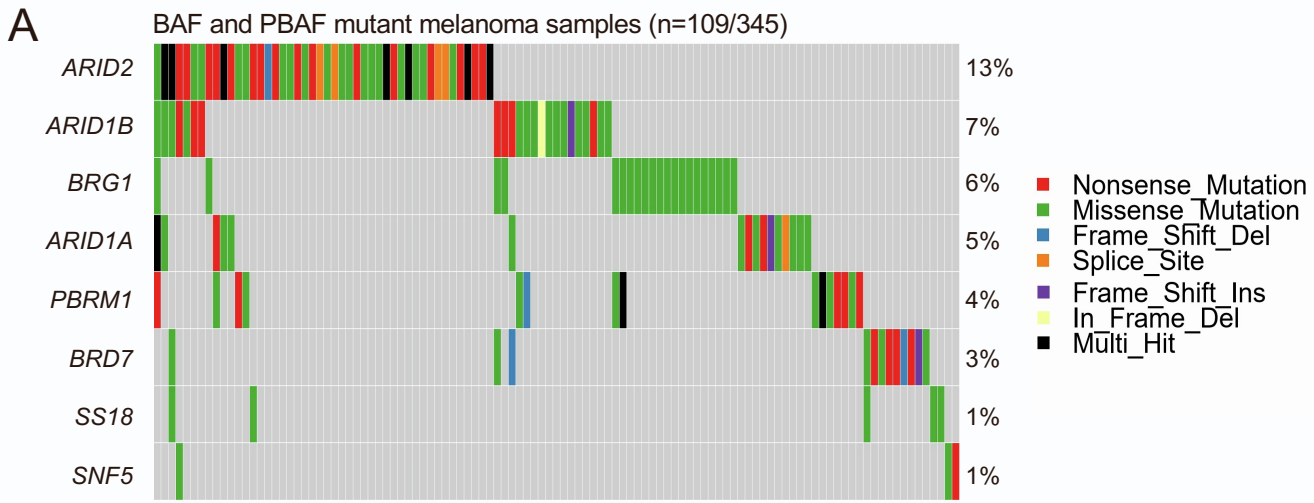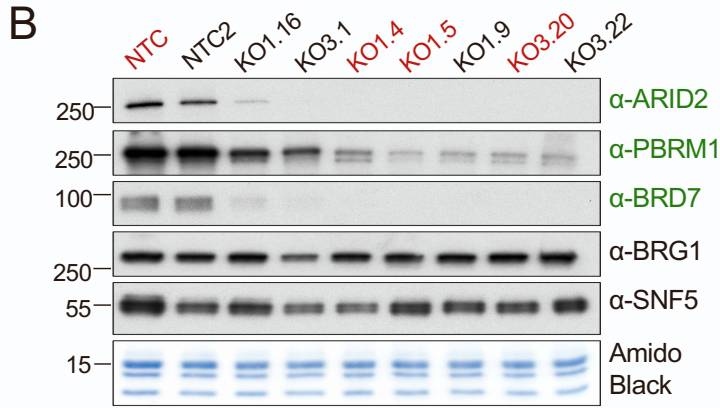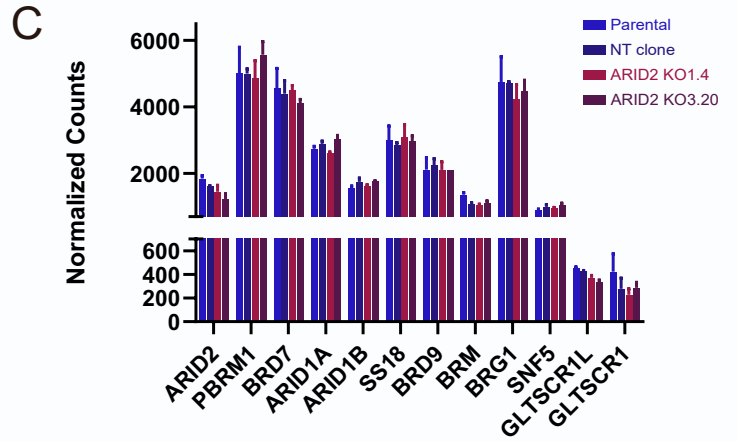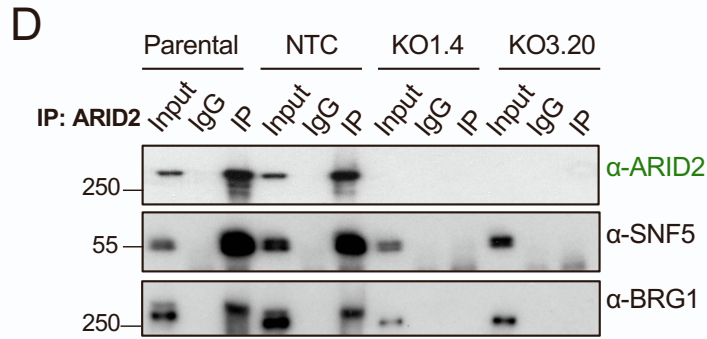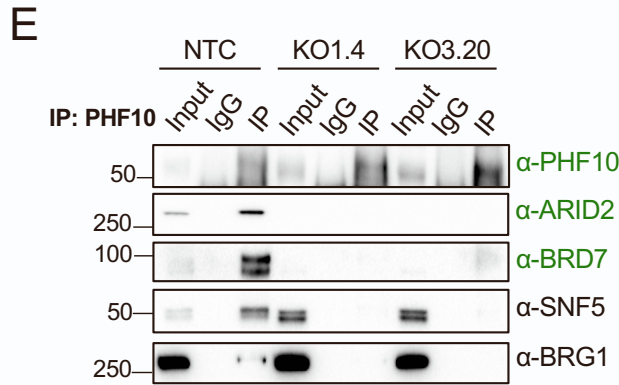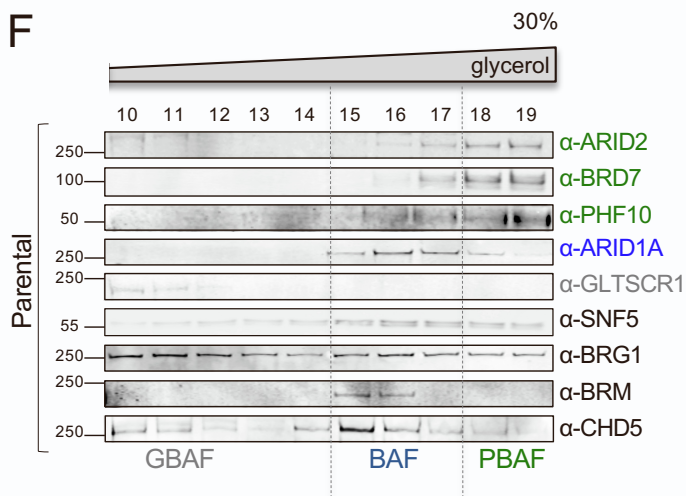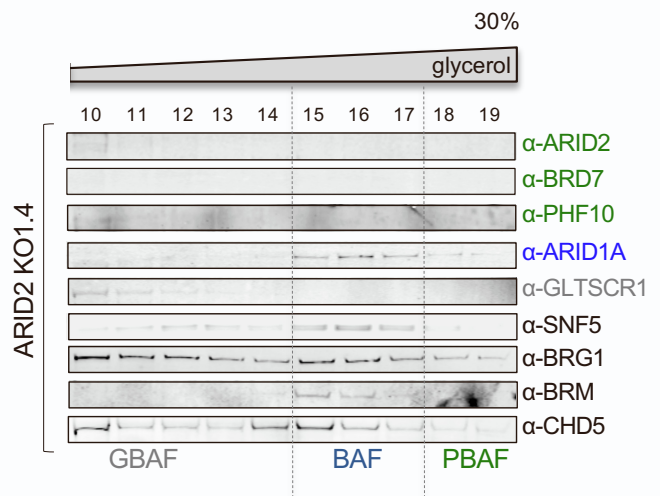

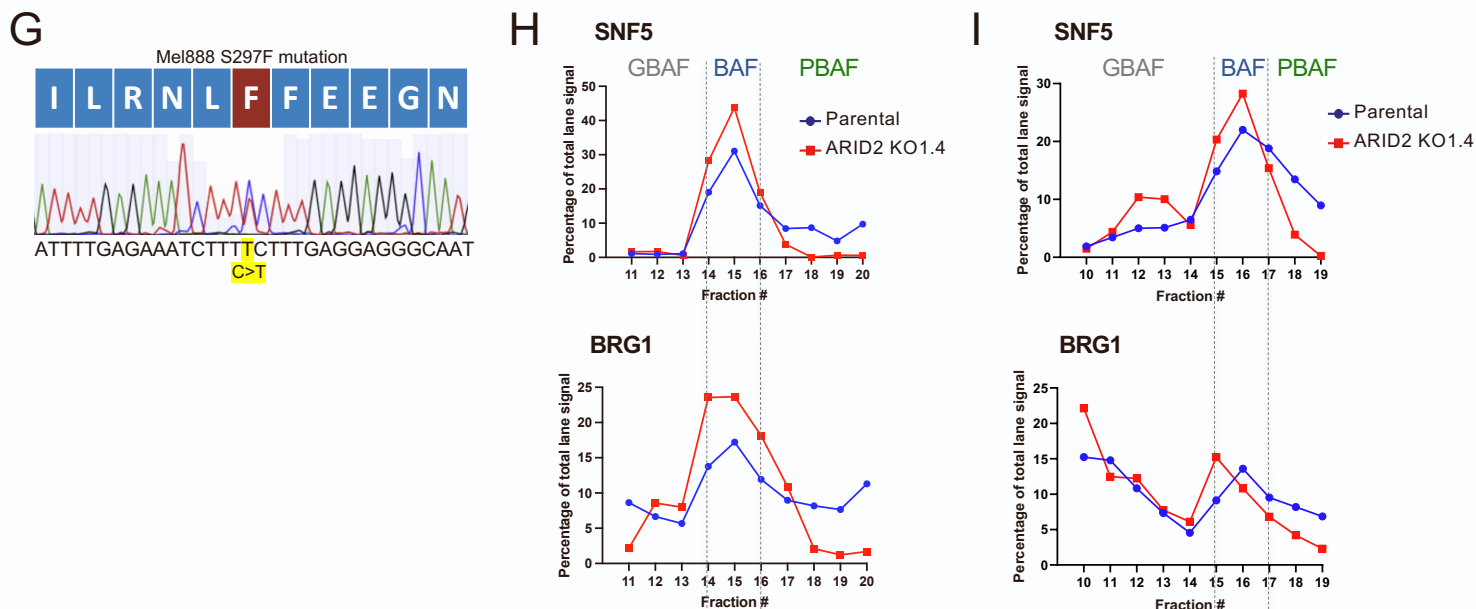

**Figure S1. Effects of ARID2 loss on SWI/SNF complexes in melanoma, Related to Figure 1. A.**

Expanded oncoplot generated from The Cancer Genome Atlas' (TCGA) skin cutaneous melanoma (SKCM) mutational data set, highlighting some of the most commonly mutated SWI/SNF subunits across cancers. Columns represent samples. **B.** Chromatin fraction immunoblot of multiple SKmel147 ARID2 CRISPR clones. Blots were stained for PBAF-specific subunits ARID2, PBRM1 and BRD7 (green) and core subunits SNF5 and BRG1 (black). Amido black staining was used as loading control. Clones highlighted in red were used for further analysis. **C.** DEseq2 normalized counts (median of ratios) of multiple SWI/SNF subunits in SKmel147 ARID2 WT and ARID2 KO clones. **D.** Immunoblots of ARID2, SNF5 and BRG1 in SKmel147 ARID2 WT and KO cells following immunoprecipitation (IP) of endogenous ARID2 and IgG as negative control. **E.** Immunoblots of PHF10, ARID2, BRD7, SNF5 and BRG1 in SKmel147 ARID2 WT and KO cells following IP of endogenous PHF10 and IgG as negative control. **F.** Immunoblots of replicate glycerol gradient sedimentation from SKmel147 ARID2 WT and KO1.4. **G.** Sanger sequencing of Mel888 confirms ARID2 mutation (S297F). **H&I.** Quantification of glycerol gradient sedimentation immunoblots from **Figure 1E** and **(F)** respectively, for SNF5 and BRG1. ImageJ was used to calculate the staining intensity as area under the curve. The total signal was calculated (i.e. the total sum of the signals from each fraction per blot) to estimate the proportion of percent signal from each fraction.

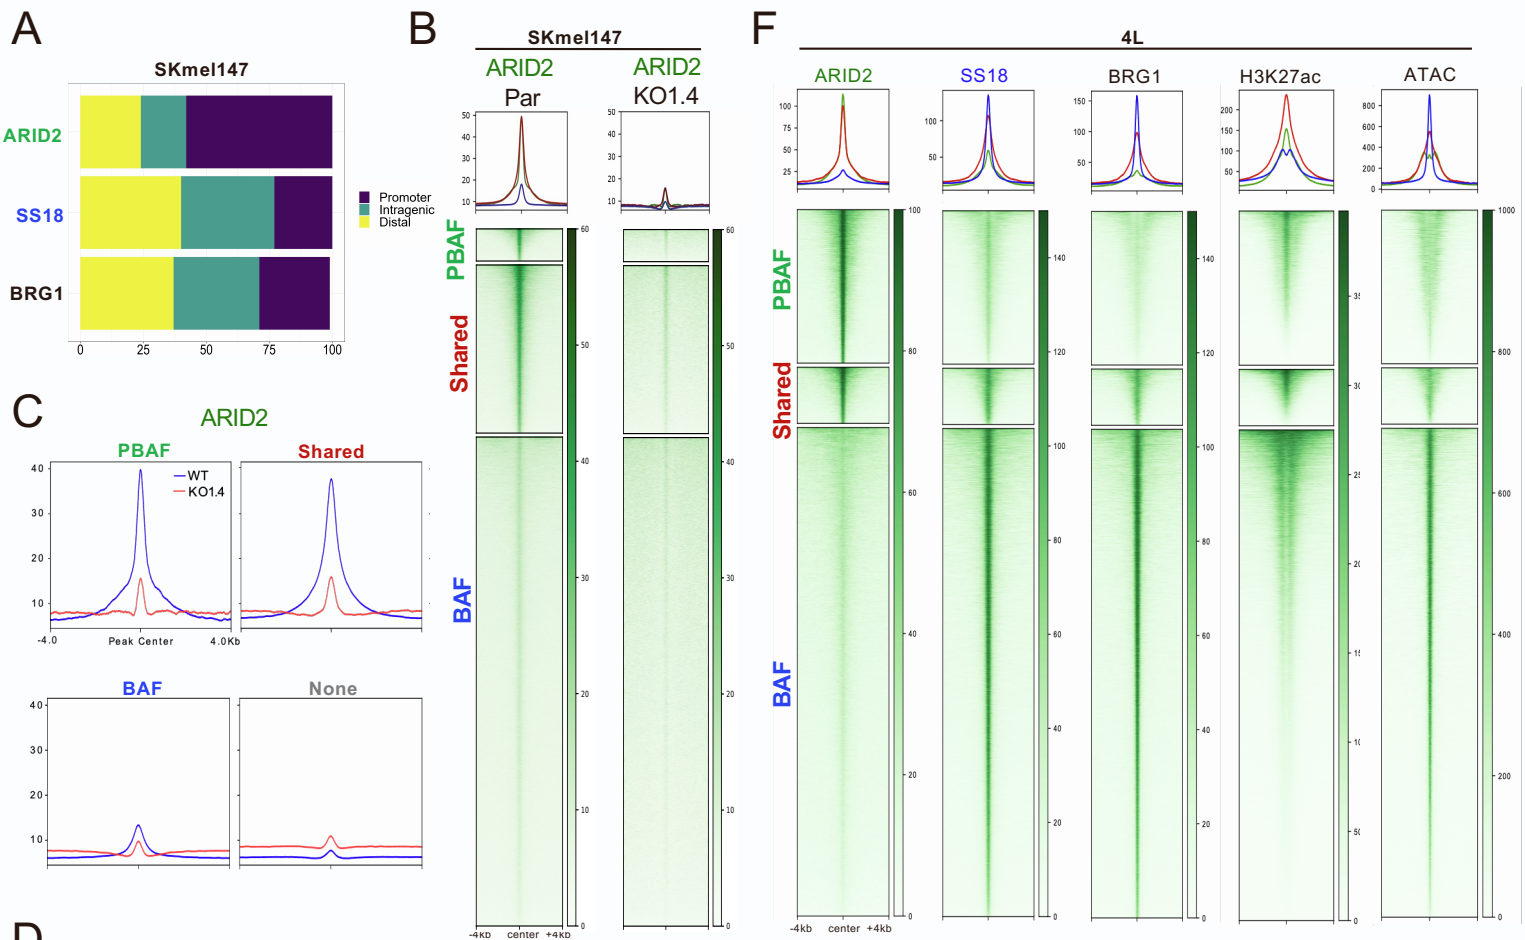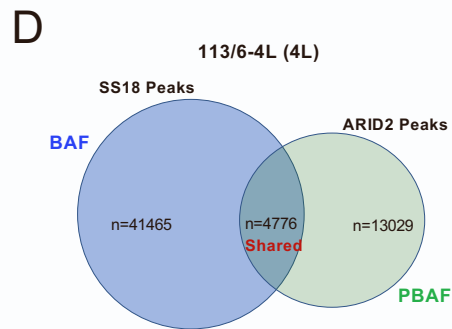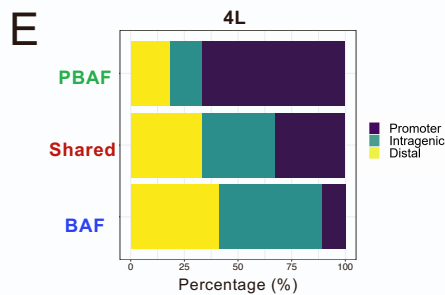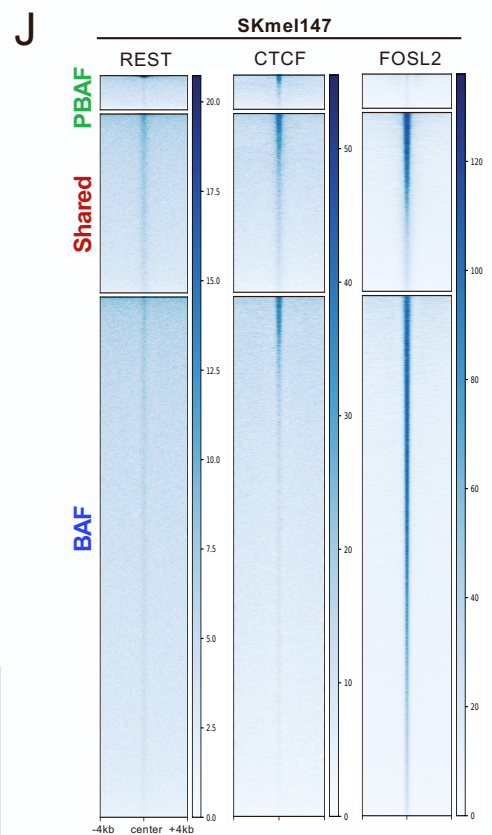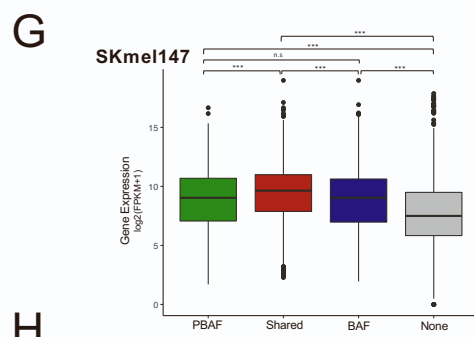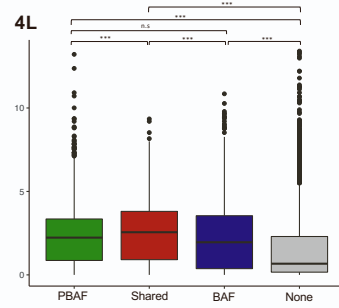

**H** SKMcl147

ARID2

| Motif | Name         | P-val   | Rank |
|-------|--------------|---------|------|
|       | AP-1(FOSL2)  | 1e-2552 | 1(2) |
|       | CTCF(L/CTCF) | 1e-371  | 2(2) |
|       | ERG (ETV4)   | 1e-347  | 3(2) |
|       | SOX10        | 1e-122  | 4    |
|       | RUNX(RUNX1)  | 1e-114  | 5(2) |

4L

SS18

| Motif | Name        | P-val    | Rank |
|-------|-------------|----------|------|
|       | AP-1(FOSL2) | 1e-21160 | 1(4) |
|       | RUNX2       | 1e-2038  | 2    |
|       | SOX10       | 1e-1296  | 3    |
|       | FLI1        | 1e-1217  | 4    |
|       | TEAD(TEAD4) | 1e-701   | 6(4) |

**I** 4L

PBAF

| Motif | Name         | P-val  | Rank |
|-------|--------------|--------|------|
|       | CTCF(L/CTCF) | 1e-241 | 1(2) |
|       | REST         | 1e-190 | 2    |
|       | BREU(E2F3)   | 1e-80  | 4(2) |
|       | NFATC2       | 1e-67  | 5    |
|       | BARHL2       | 1e-54  | 6    |

4L

Shared

| Motif | Name          | P-val | Rank |
|-------|---------------|-------|------|
|       | ERG           | 1e-83 | 1    |
|       | ZFP410(TEAD3) | 1e-64 | 2(2) |
|       | FOSL1         | 1e-58 | 3    |
|       | IRF4          | 1e-30 | 5    |
|       | MITF          | 1e-29 | 7    |

4L

BAF

| Motif | Name        | P-val   | Rank |
|-------|-------------|---------|------|
|       | SOX3(SOX10) | 1e-2247 | 1(2) |
|       | ATF3        | 1e-1769 | 2    |
|       | MITF        | 1e-1355 | 3    |
|       | RUNX        | 1e-968  | 5    |
|       | FLI1        | 1e-881  | 6    |

**Figure S2. Differential and shared genomic localization of ARID2 and SS18, Related to Figure 2.**

**A.** Bar plots displaying the percentage of ARID2, SS18, and BRG1 peaks in SKmel147 occupying promoters, distal and intragenic regions mapped using clusterProfiler. **B.** Heatmaps of ChIP-seq enrichments of ARID2 in SKmel147 ARID2 WT (Parental) and KO (KO1.4) cells. Enrichment centered on PBAF, shared and BAF regions as defined by ARID2 and SS18 ChIP-seq significant peaks. Signals were plotted  $\pm 4$  kb around the peak centers. **C.** Metagene profiles of SKmel147 ARID2 WT (Parental) and KO (KO1.4) enrichment of ARID2 ChIP-seq, same as in (B), at PBAF, shared, and BAF regions, and at open chromatin regions detected by ATAC-seq that do not overlap with a PBAF, shared or BAF region (None). **D.** Intersection of significant peaks between ARID2 and SS18 ChIP-seq in 113/6-4L (4L) used to defined PBAF, BAF, and shared regions. **E.** Bar plots displaying the percentage of PBAF, shared, and BAF regions in 4L occupying promoters, distal, and intragenic regions mapped using clusterProfiler. Promoters ( $\pm 2$  kb relative to TSS), intragenic and distal annotations were defined according to human hg19 gene annotation. **F.** Heatmaps of ChIP-seq enrichment for ARID2, SS18, BRG1, H3K27ac, and ATAC-seq centered on PBAF, shared, and BAF regions defined in (D). Signals were plotted  $\pm 4$  kb around the peak center. **G.** Box plots displaying gene expression of promoters in SKmel147 (left) and 4L (right) that intersect with a PBAF (n=1,721 and n=7,774), respectively), shared (n=8,833 and n=1,602), BAF region (n=3,790 and n=3,701), or none (n=3,646 and n=11,857) of those three regions. Significance calculated using ANOVA with Tukey's multiple comparison tests **H.** Transcription factor motif analysis of the ARID2 and SS18 regions centered at the summits of the ATAC peaks ( $\pm 200$  bp) in Skmel147; generated with the HOMER suite. **I.** Transcription factor motif analysis of the PBAF, shared, and BAF regions centered at the summits of the ATAC peaks peaks ( $\pm 200$  bp) in 4L; generated with the HOMER suite. **J.** Heatmaps of ChIP-seq enrichment for REST, FOSL2, and CTCF in SKmel147 cells centered on PBAF, shared, and BAF regions. Signals were plotted  $\pm 4$  kb around the peak center.

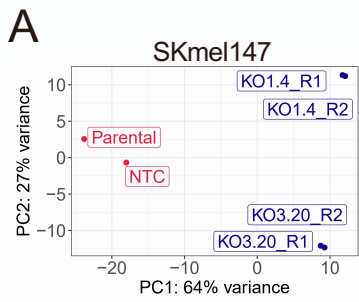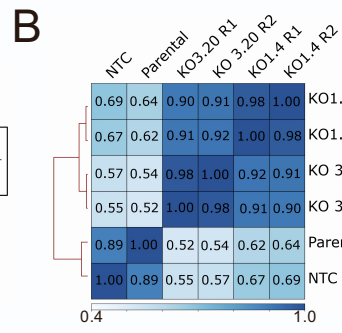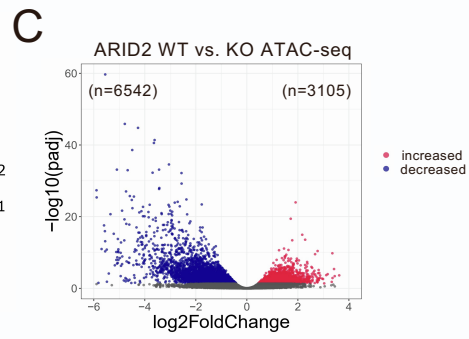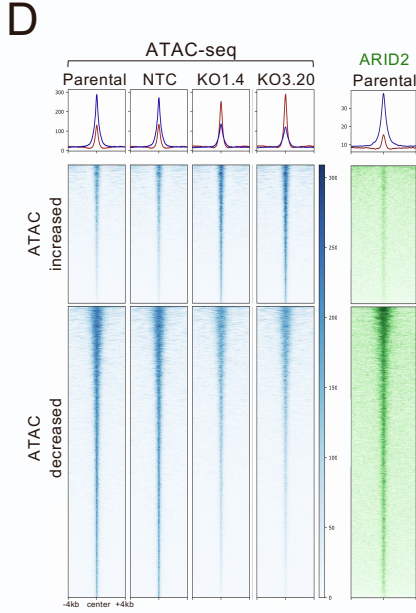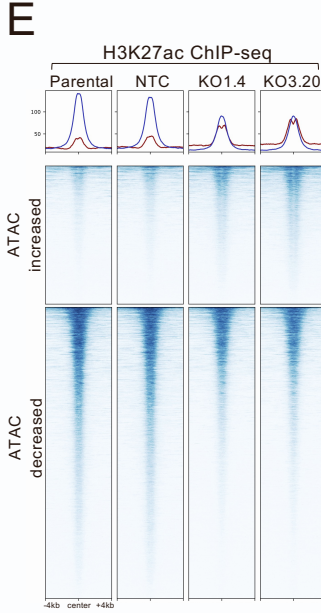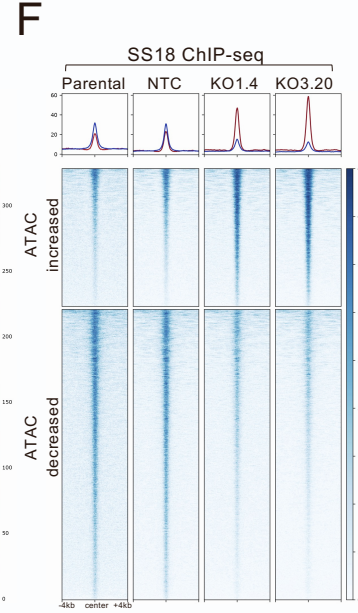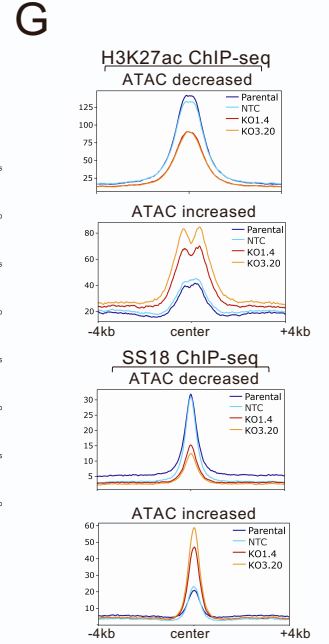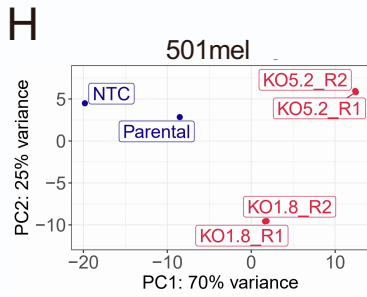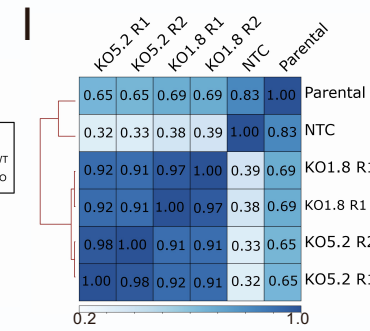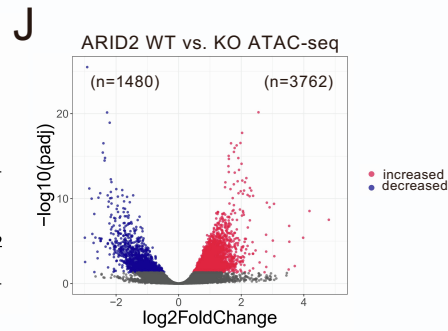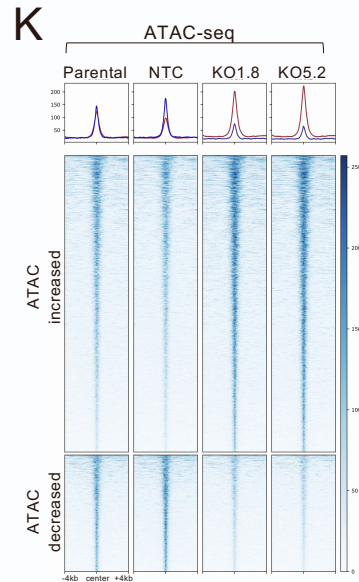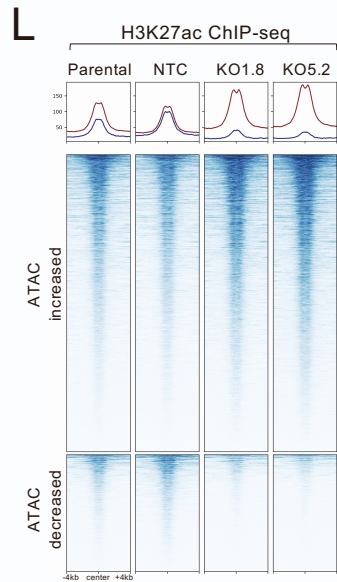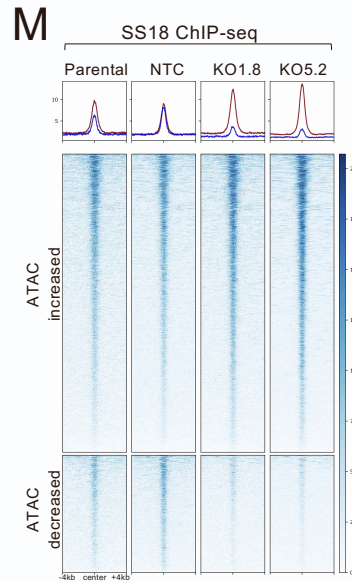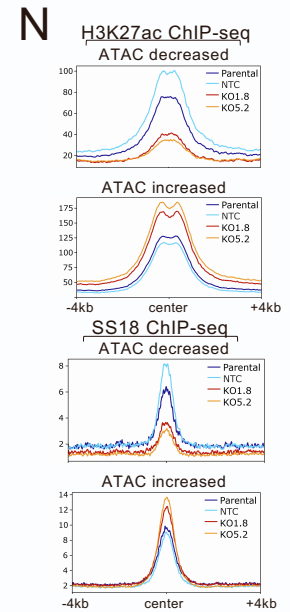

O

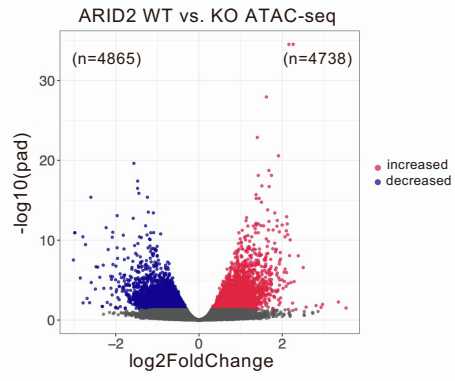

P

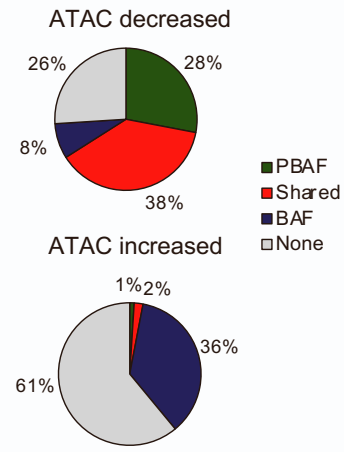

Q

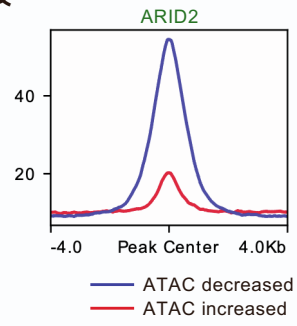

**Figure S3. PBAF loss results in chromatin accessibility deregulation and altered BAF binding, Related to**

**Figure 3. A.** Two-dimensional PCA using all ATAC-seq significant regions (n=224,847) in SKmel147. **B.** Pearson correlation plot of the deregulated ATAC-seq regions in SKmel147. **C.** Volcano plot highlighting significantly increased (n = 6542) and decreased (n = 3105) ATAC-seq regions in SKmel147; called with DEseq2 with an adjusted p-value < 0.05. **D.** Heatmaps and metagene profiles of ATAC enrichment in SKmel147 ARID2 WT (Parental and NTC) and KO (KO1.4 and KO3.20) cells centered at ATAC-seq significantly deregulated regions; heatmap and metagene profile of ARID2 enrichment in ARID2 WT (Parental) cells shown. Signals were plotted  $\pm$  4 kb around the peak center. ATAC increased n = 3105 peaks, ATAC decreased n = 6542. **E.** Heatmaps and metagene profiles of H3K27ac enrichment as in (D), centered at ATAC-seq significantly deregulated regions. **F.** Heatmaps and metagene profiles of SS18 enrichment as in (D), centered at ATAC-seq significantly deregulated regions. **G.** Metagene profiles of H3K27ac and SS18 enrichment in SKmel147 ARID2 WT (Parental and NTC) and KO (KO1.4 and KO3.20) cells centered at ATAC-seq significantly deregulated regions. **H.** Two-dimensional PCA using all ATAC-seq significant regions (n=224,847) in 501mel. **I.** Pearson correlation plot of the differential ATAC-seq regions clustered by ARID2 status in 501mel. **J.** Volcano plot highlighting significantly increased (n = 3762) and decreased (n = 1480) ATAC-seq regions in 501mel; called with DEseq2 with an adjusted p-value < 0.05. **K.** Heatmaps and metagene profiles of ATAC enrichment in 501mel ARID2 WT (Parental and NTC) and KO (KO1.8 and KO5.2) cells centered at ATAC-seq significantly deregulated regions. Signals were plotted  $\pm$  4 kb around the peak center. ATAC increased n = 3762 peaks, ATAC decreased n = 1480. **L.** Heatmaps and metagene profiles of H3K27ac enrichment as in (K) centered at ATAC-seq significantly deregulated regions. **M.** Heatmaps and metagene profiles of SS18 as in (K) centered at ATAC-seq significantly deregulated regions. **N.** Metagene profiles of H3K27ac and SS18 enrichment in 501mel ARID2 WT (Parental and NTC) and KO (KO1.8 and KO5.2) cells centered at ATAC-seq significantly altered regions. **O.** Volcano plot highlighting significantly increased (n = 4738) and decreased (n = 4965) ATAC-seq regions in 4L; called with DEseq2 with an adjusted p-value < 0.05. **P.** Pie charts displaying the percentage of ATAC decreased and ATAC increased regions at PBAF, shared, and BAF sites, or None (no SWI/SNF binding). **Q.** Metagene profiles of ARID2 enrichment in 4L ARID2 WT (Parental) cells centered at ATAC-seq significantly deregulated regions. Signals were plotted  $\pm$  4 kb around the peak center.



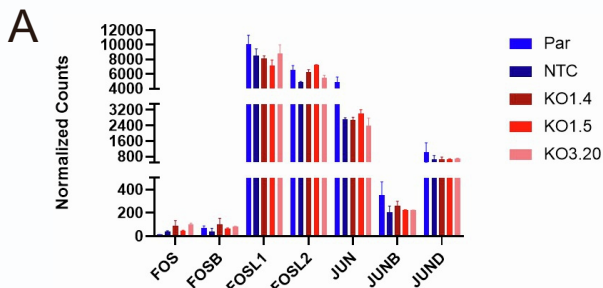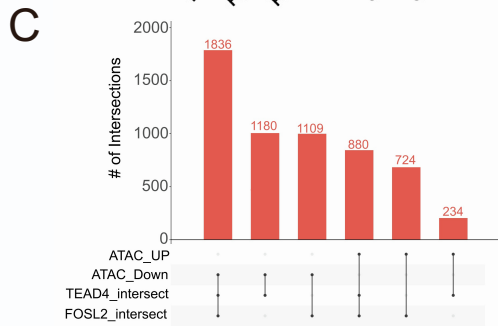

**D** ATAC-FOSL2 decreased (**Shared**) ATAC-FOSL2 increased (**BAF**) ATAC-TEAD4 decreased (**Shared**) ATAC-TEAD4 increased (**BAF**)

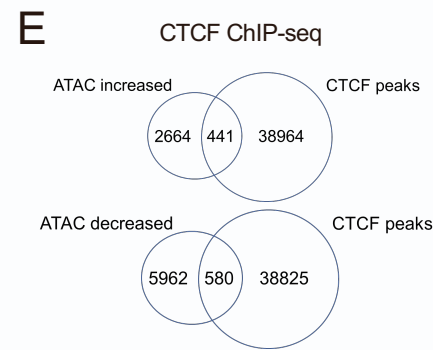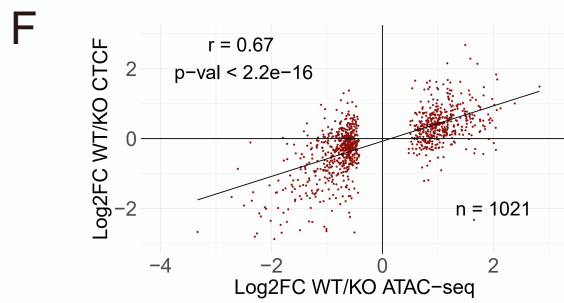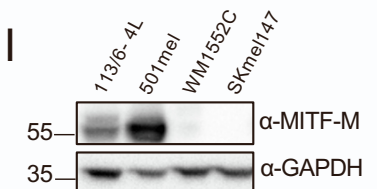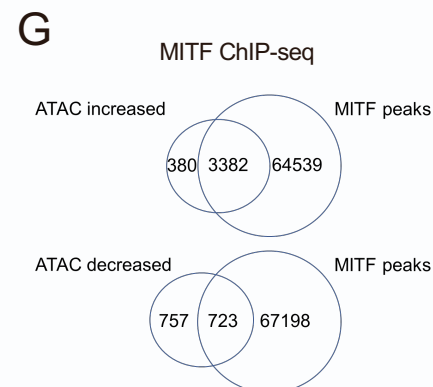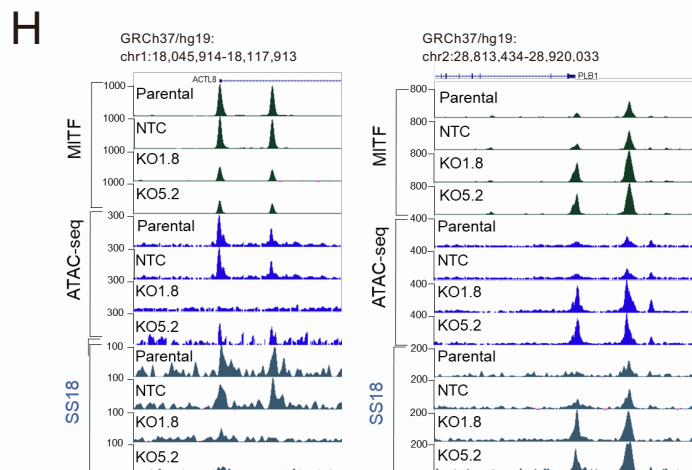

**Figure S4. PBAF and BAF changes alter distinct TF enrichment upon PBAF loss, Related to Figure 4.** **A.** DEseq2 normalized counts (median of ratios) of AP-1 family TFs expressed in SKmel147 ARID2 WT and ARID2 KO clones. **B.** Intersection of ATAC increased and decreased regions with significantly called TEAD4 and FOSL2 peaks in SKmel147 ARID2 WT (Parental and NTC) and KO (KO1.4 and KO3.20) cells. **C.** Upset plot of the intersections between FOSL2, TEAD4 and ATAC deregulated peaks. **D.** Snapshots of the UCSC genome browser (GRCh37/hg19) showing FOSL2 and TEAD4 binding at ATAC decreased and increased regions, respectively. **E.** Intersection of ATAC increased and decreased regions with significantly called CTCF peaks in SKmel147 ARID2 WT (Parental and NTC) and KO (KO1.4 and KO3.20) cells. **F.** Scatterplot of SKmel147 ARID2 WT/KO log<sub>2</sub> fold changes of CTCF with ATAC log<sub>2</sub> fold changes at ATAC significantly increased and decreased regions. Pearson correlation displayed. **G.** Intersection of ATAC increased and decreased regions with significantly called MITF peaks in 501mel ARID2 WT (Parental and NTC) and KO (KO1.8 and KO5.2) cells. **H.** Snapshots of the UCSC genome browser (GRCh37/hg19) showing MITF binding at ATAC decreased and increased regions, respectively. **I.** Whole cell extract immunoblots of 4L, 501mel, WM1552C (primary melanoma), and SKmel147 cell lines probed for MITF (M isoform) and GAPDH as loading control.

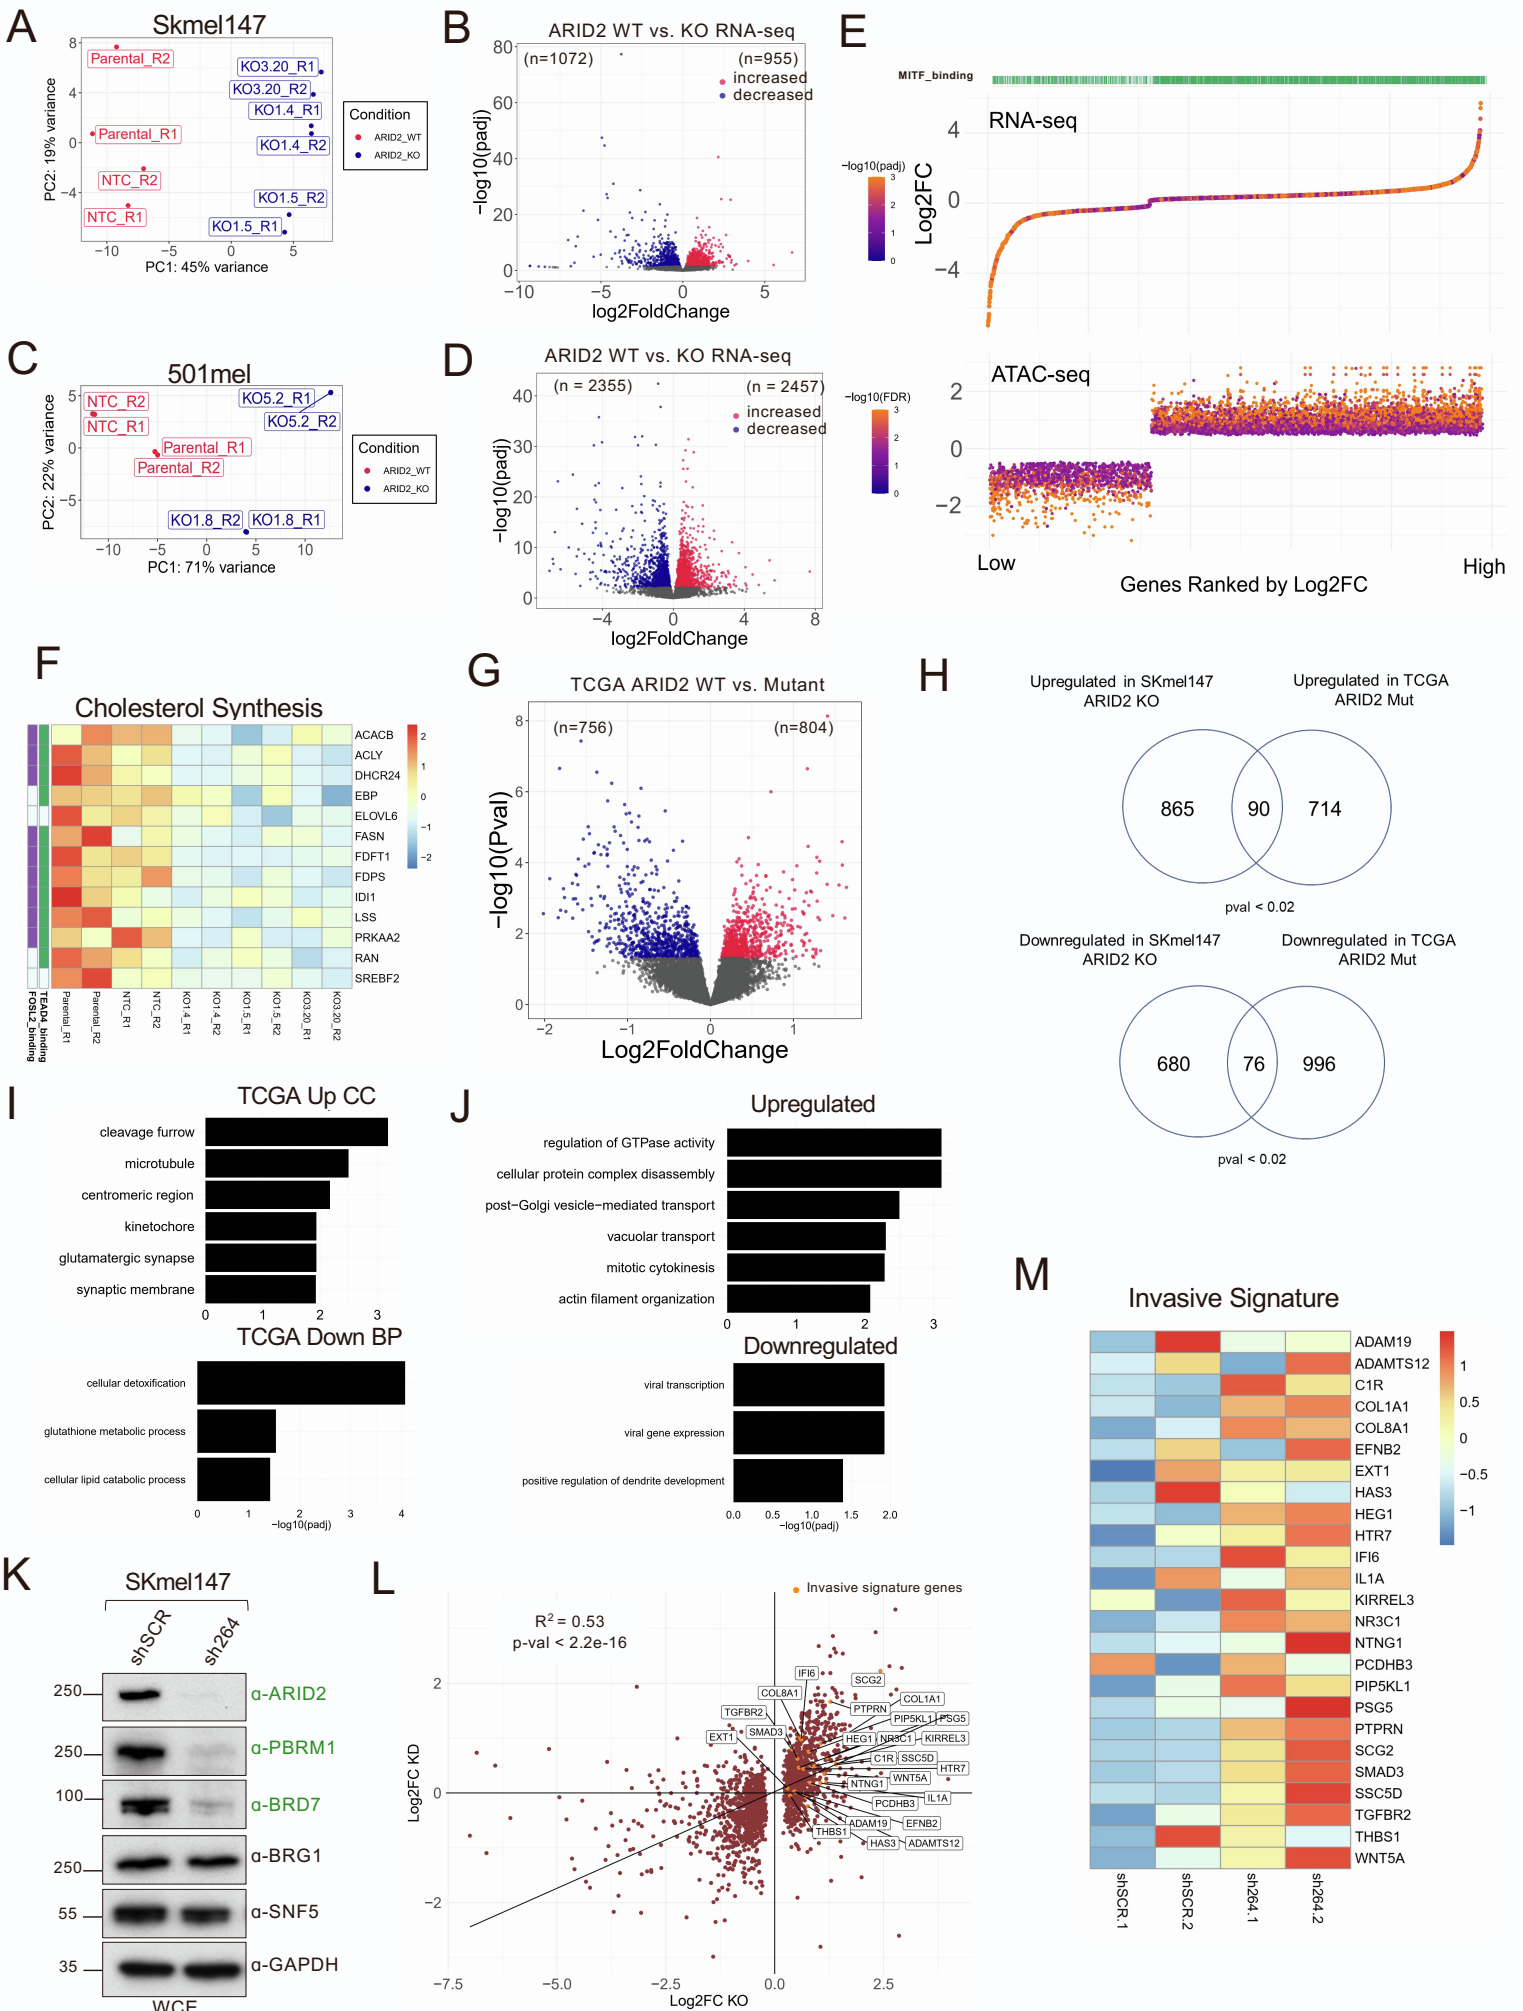

**Figure S5. PBAF loss results in transcriptional changes that correlate with TF binding deregulation, Related to Figure 5.** **A.** Two-dimensional PCA of all expressed genes SKmel147 ARID2 WT (Parental and NTC) and KO (KO1.4, KO1.5, and KO3.20) (n=17092) cells. **B.** Volcano plot highlighting significantly upregulated (n = 955) and downregulated (n = 1072) genes in SKmel147 cells as in (A). Deregulated genes were called with DEseq2 with an adjusted p-values < 0.05. **C.** Two-dimensional PCA of all expressed genes in 501mel ARID2 WT (Parental and NTC) and KO (KO1.8 and KO5.2) cells (n = 14833). **D.** Volcano plot highlighting significantly upregulated (n=2457) and downregulated (n = 2355) genes in 501mel cells as in (C). Deregulated genes were called with DEseq2 with an adjusted p-value < 0.05. **E.** Association of ranked deregulated genes in 501mel ARID2 KO vs. ARID2 WT cell lines with their associated ATAC increased or decreased peaks (within a TAD and within  $\pm 500$  kb of the TSS) and their MITF status. **F.** Heatmap of significantly downregulated genes associated with ATAC decreased regions involved in the regulation of cholesterol synthesis in SKmel147. **G.** Volcano plot highlighting upregulated (n = 804) and downregulated (n = 756) genes in ARID2 mutant vs. ARID2 WT TCGA samples (n = 334). P-val < 0.05. **H.** Venn diagrams of deregulated genes intersected between SKmel147 and TCGA melanoma samples. Overlap significance calculated with Fisher's exact test. **I.** Gene Ontology (GO) analysis of genes upregulated and downregulated in TCGA ARID2 mutant vs. ARID2 WT in the Cellular Compartment (CC) and the Biological Process (BP) gene sets. **J.** Biological Process Gene Ontology (GO) analysis of genes associated with chromatin changes upregulated and downregulated in 501mel ARID2 KO vs. ARID2 WT cell lines. **K.** Whole cell extract immunoblots of SKmel147 cell lines infected with shScramble (shSCR) control or shRNA targeting ARID2 (sh264) probed for ARID2, PBRM1, BRG1, SNF5, and GAPDH as loading control. **L.** Scatterplot of SKmel147 ARID2 WT/KO log<sub>2</sub> fold changes of all expressed genes with SKmel147 shSCR/sh264 log<sub>2</sub> fold change, with invasive signature genes (same as in **Figure 5D**) highlighted. Pearson correlation displayed. **M.** Heatmap of invasive signature genes (as in **Figure 5D**) in SKmel147 infected with shSCR control or sh264 targeting ARID2.

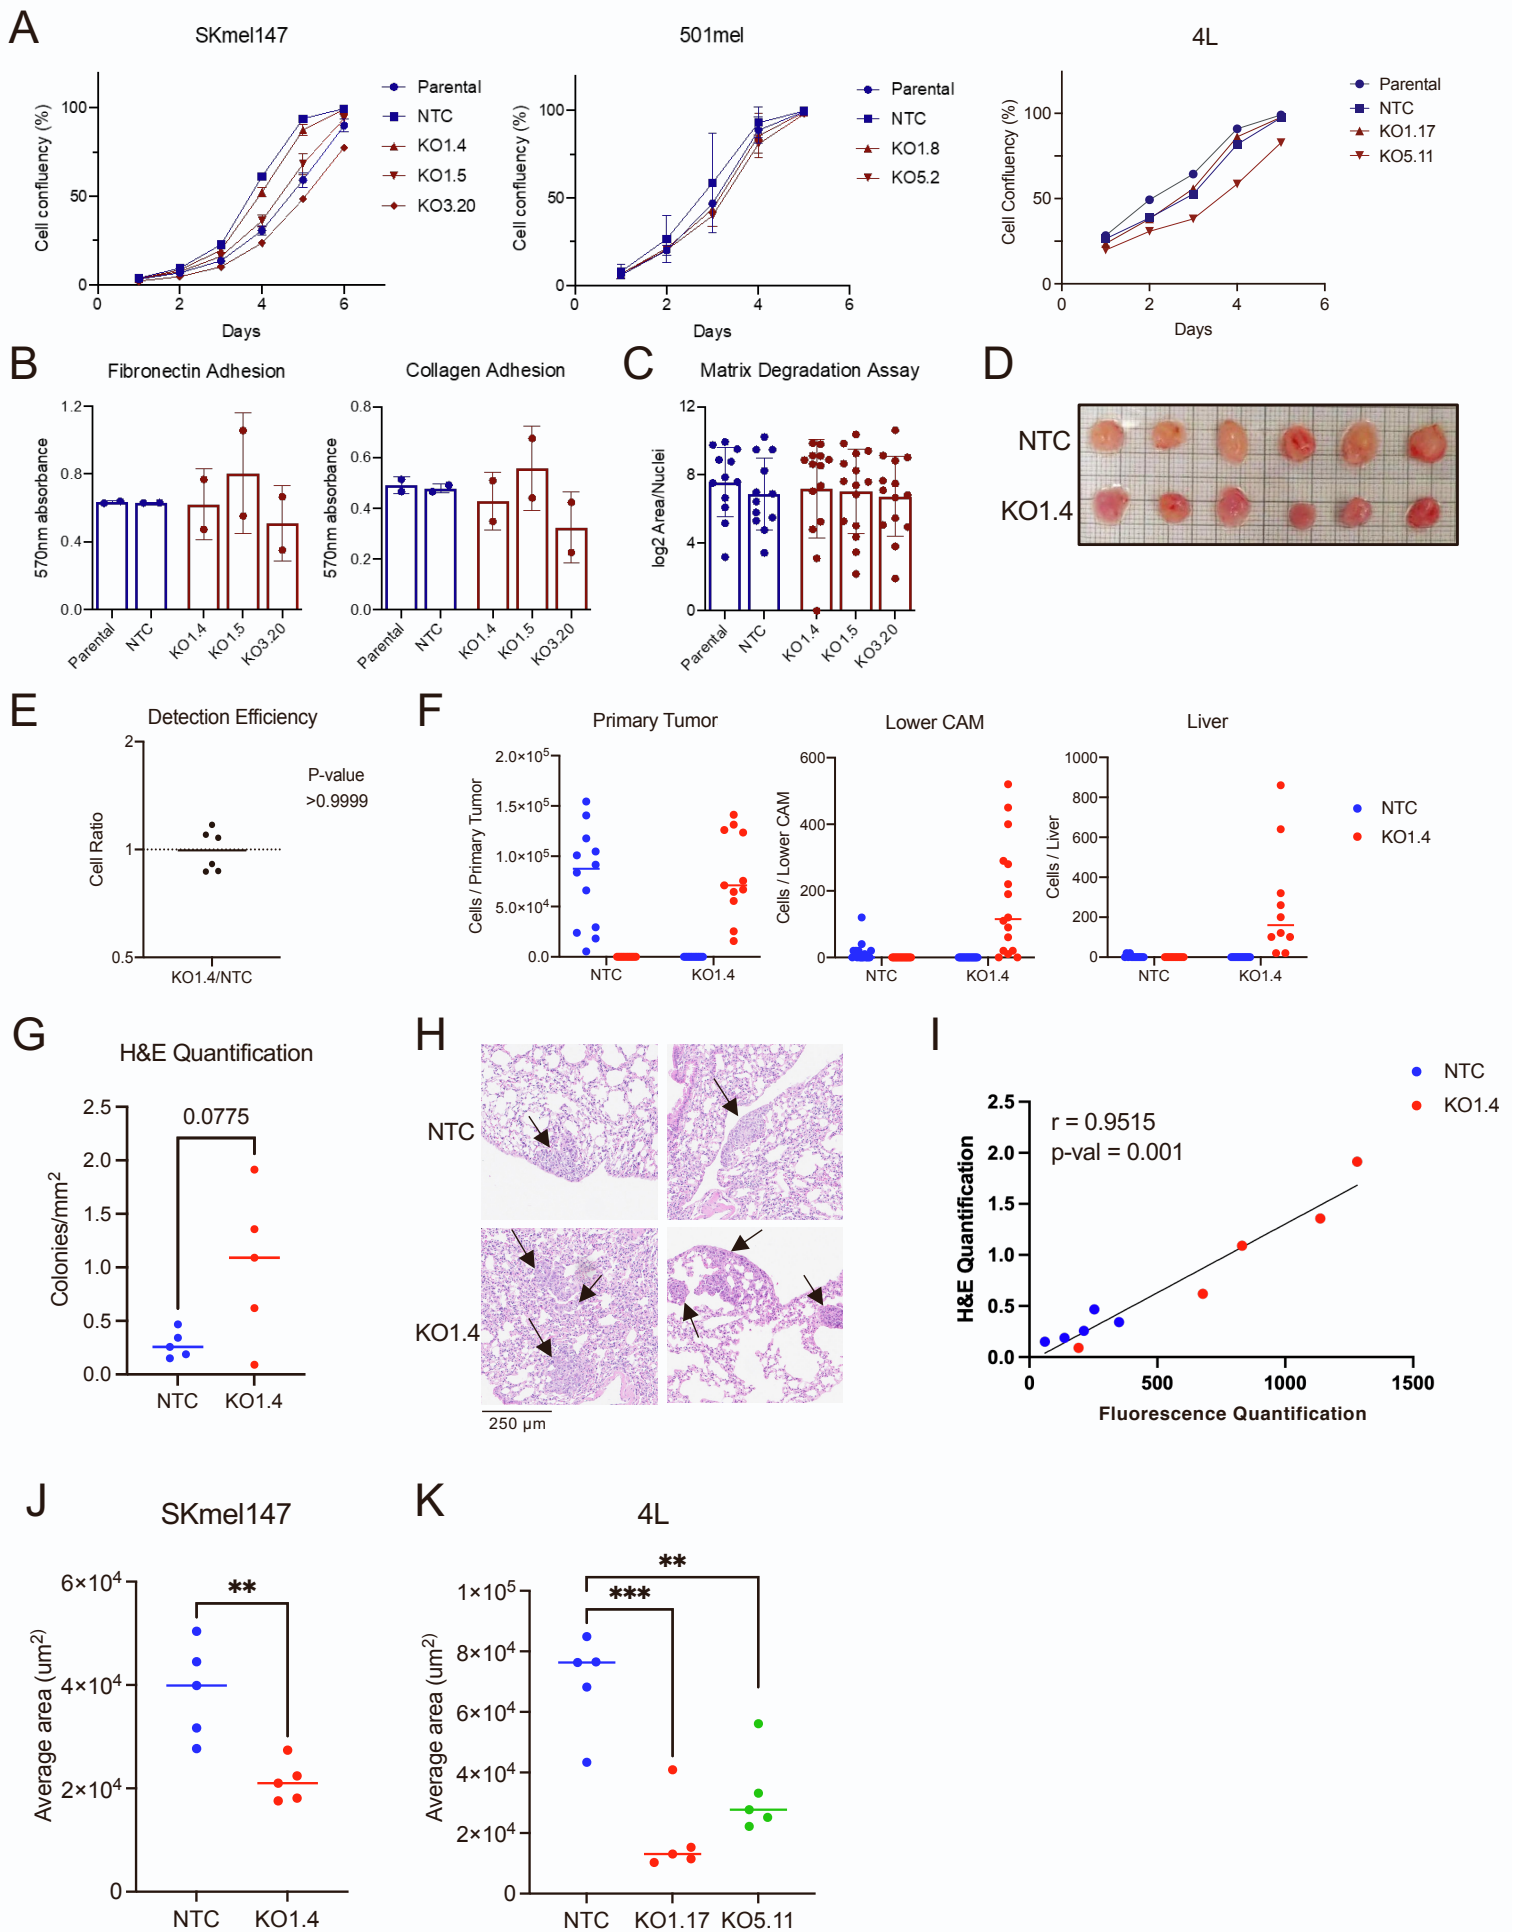

**Figure S6. Assessing phenotypic changes upon PBAF loss in melanoma cells, Related to Figure 6.** **A.** SKmel147 (n = 3), 501mel (n = 3), and 4L (n = 3) cell proliferation analysis measured over the course of 5-6 days as percent confluence. **B.** Adhesion assay of SKmel147 ARID2 WT and KO cells plated on fibronectin (n = 2) or collagen coated plates (n = 2). **C.** Matrix degradation assay of SKmel147 ARID2 WT and KO cells (n = 2). **D.** Image of primary tumors SKmel147 NTC (n=5) and KO1.4 (n = 5) collected from the CAM. **E.** Equal efficiency of Skmel147 ARID2 WT (GFP+) and KO (mCherry+) cell detection by flow cytometry, shown as the ratio of mCherry+ to GFP+ particles detected in samples spiked with equal numbers of WT and KO cells (non-inoculated CAM, n = 5; FACS buffer, n = 1). Y-axis is displayed on logarithmic scale. P-value shown for Wilcoxon signed-rank test for an expected median value of 1. **F.** Specificity of Skmel147 ARID2 WT (GFP+) and KO (mCherry+) cell detection by flow cytometry, shown as the complete absence of mCherry+ cells in eggs inoculated with WT cells, and of GFP+ cells in eggs inoculated with KO cells, in all samples analyzed in **Figure 6B**. **G.** Quantification of SKmel147 metastatic lung colonies from same mice as in **Figure 6D, E** based on H&E staining. Welch's t-test. P-value shown on graph. **H.** Representative H&E images of NTC and KO1.4 lung colonies same as in (G). **I.** Scatterplot of SKmel147 tail vein experiment quantification methods, either by fluorescence imaging in **Figure 6D, E** or H&E staining in (G). Spearman correlation is displayed. **J.** Quantification of the average area of SKmel147 metastatic lung colonies from mice in **Figure 6D, E**. Welch's t-test. \*\*P-val < 0.01. **K.** Quantification of the average area of 4L metastatic lung colonies from mice in **Figure 6F**. Welch's t-test. \*\*P-val < 0.01, \*\*\*P-val < 0.001.
